# Supplementary material for: Boosting the photothermal performance of vacancy-rich MoSe2−x nanoflowers for photoacoustic imaging guided tumor chemo-photothermal therapy
Source: Royal Society of Chemistry journal article supplement (doi:10.1039/d1nr03306a), 2021-01-01
Supplement: d1nr03306a1.pdf [file d1nr03306a1.pdf]

## Supporting Information

### **Boosting the Photothermal Performance of Vacancy MoSe<sub>2-x</sub> Nanoflowers for Photoacoustic Imaging Guided Tumor Chemo- photothermal Therapy**

Fei Gao <sup>\* a</sup>, Yuqing Miao <sup>a</sup>, Huijun Ma <sup>c</sup>, Tingbin Zhang <sup>c</sup>, Haiming Fan <sup>c</sup>, Lingyun Zhao <sup>\* b</sup>

*a Institute of Integrated Medicine, Shaanxi University of Chinese Medicine, Xi'an 712046, China*

*E-mail: [1351017@sntcm.edu.cn](mailto:1351017@sntcm.edu.cn)*

*b Key Laboratory of Advanced Materials of Ministry of Education of China, Key Laboratory of Advanced Materials of Ministry of Education of China, School of Materials Science & Engineering, Tsinghua University, Beijing 100084, China*

*E-mail: [lyzhao@mail.tsinghua.edu.cn](mailto:lyzhao@mail.tsinghua.edu.cn)*

*c Natural Functional Molecule Chemistry of the Ministry of Education, College of Chemistry and Materials Science, Northwest University, Xi'an, Shaanxi, 710069, China*

**S1.** The calculation of photothermal conversion efficiencies.

**Figure S1.** The SEM images and FT-IR spectra of MNFs.

**Figure S2.** The concentration-dependent absorbance and UV-vis-NIR absorption spectra of MNFs.

**Figure S3.** Blood circulation curve of MNFs.

**Figure S4.** Biodistribution in mice of MNFs and MNFs-2DG.

**Figure S5.** Experimental design of the antitumor study.

**Figure S6.** The photographs of representative mice.

**Figure S7.** The H&E staining results.

## S1. Photothermal conversion efficiencies

The photothermal conversion efficiencies were calculated as follows. The total energy balance was described as:

$$\sum_i m_i C_p \frac{dT}{dt} = Q_{in, np} + Q_{in, surr} - Q_{out} \quad 1$$

where  $m$  and  $C_p$  are the mass and heat capacity of the solvent (water),  $T$  is the temperature of the solution respectively.  $Q_{in, np}$  is the photothermal energy inputted by the MoSe<sub>2</sub> nanoflowers (MNFs), which can be determined by:

$$Q_{in, np} = I(1 - 10^{-A_\lambda})\eta \quad 2$$

Where  $I$  is the laser power used in the experiment, and the  $A_\lambda$  is the absorbance of the nanoparticles at the used wavelength (808 nm). The  $\eta$  is the photothermal conversion efficiency.

In addition,  $Q_{in, surr}$  expressed the heat input absorbed by the solvent and the container (cuvette), which is described as follows:

$$Q_{in, surr} = Q_{Dis} = hS_{buff} \times (T_{max} - T_{surr})_{buff} \quad 3$$

where  $h$  is heat transfer coefficient and  $S_{buff}$  is the surface area of the contained.  $T_{max}$  is the maximum steady temperature of the solvent, and  $T_{surr}$  is the ambient surrounding temperature. The  $Q_{Dis}$  was measured independently to be 0.1452 mW.

Besides,  $Q_{out}$  is the heat loss to the surrounding:

$$Q_{out} = hS(T - T_{surr}) \quad 4$$

In the equation,  $hS$  can be calculated by determining the rate of temperature decrease when removing the laser. Without the light source, combining eq. (4) with eq. (1) can deduce:

$$\sum_i m_i C_{p,i} \frac{dT}{dt} = -Q_{out} = -hS(T - T_{surr}) \quad 5$$

With carefully rearrangement and deducement,  $t$  is expressed as the following equation:

$$t = -\left(\frac{m_{buff} C_{p,buff}}{hS}\right) \ln\left(\frac{T - T_{surr}}{T_{max} - T_{surr}}\right) \quad 6$$

Where two rate constants are defined as  $\tau_s$

$$\tau_s = \frac{m_{buff} C_{p,buff}}{hS} \quad 7 \quad \text{and} \quad \theta = \left(\frac{T - T_{surr}}{T_{max} - T_{surr}}\right) \quad 8$$

Combining eq. (6), eq. (7) and eq. (8) yields:

$$t = -\tau_s \ln(\theta) \quad 9$$

In order to get the  $hS$ , we measured the cooling curve and  $\tau_s$  can be determined.

At the maximum steady temperature, eq. (10) is 0 and the following is obtained

$$Q_{in, np} + Q_{in, surr} = I(1 - 10^{(-A_\lambda)})\eta + Q_{Dis} = hS(T_{max} - T_{surr}) \quad 10$$

Therefore, the final photothermal conversion efficiency can be determined as

$$\eta = \frac{hS(T_{max} - T_{surr}) - Q_{Dis}}{I(1 - 10^{(-A_\lambda)})\eta} \quad 11$$

$I$  is the laser power used during the experiment and  $A_{808}$  is the absorbance of the nanoparticles at the wavelength of 808 nm. The absorbance of MNFs at 808 nm is 1.215. In addition, the  $m$  is 0.5 g and the  $C$  is 4.2 J/g. The 808 nm laser photothermal conversion efficiency ( $\eta$ ) of MNFs can be calculated to be 41.7 %.

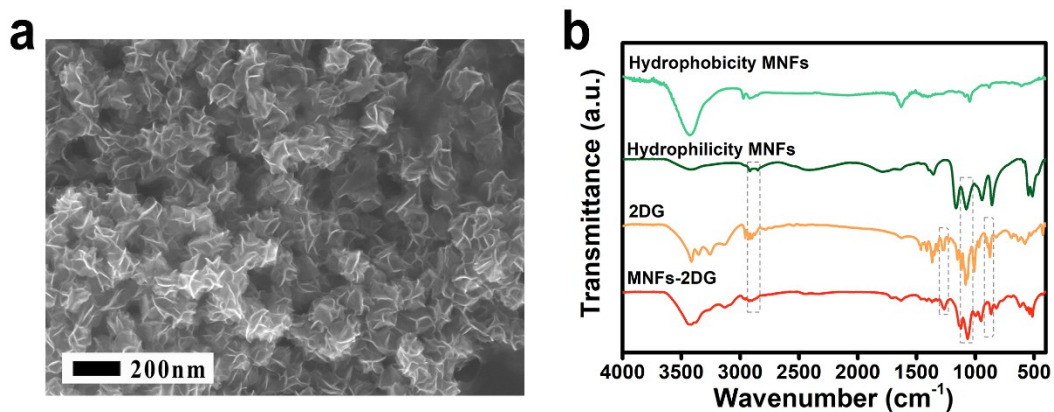

**Figure S1.** (a) SEM images of hydrophilic MNFs and (b) FT-IR spectra of hydrophobicity MNFs, hydrophilicity MNFs, 2DG and MNFs-2DG.

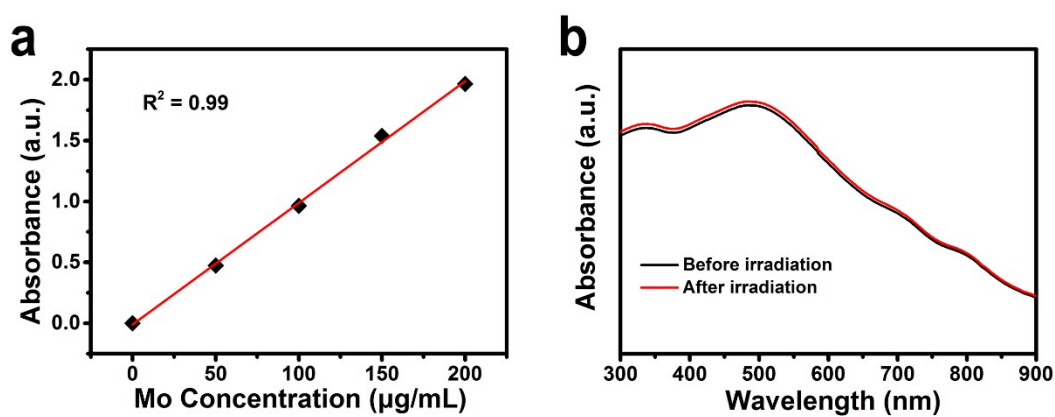

**Figure S2.** (a) The concentration-dependent absorbance of MNFs at 808 nm. (b) The UV-vis-NIR absorption spectra of MNFs before and after NIR irradiation five laser on/off cycles.

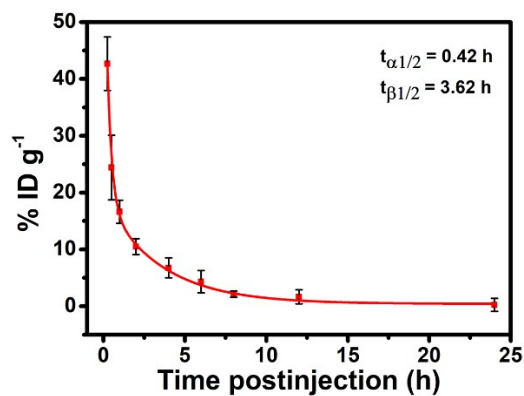

**Figure S3.** (a) Blood circulation curve of MNFs in mice by measuring the Mo concentration in the blood at different time points after intravenous injection.

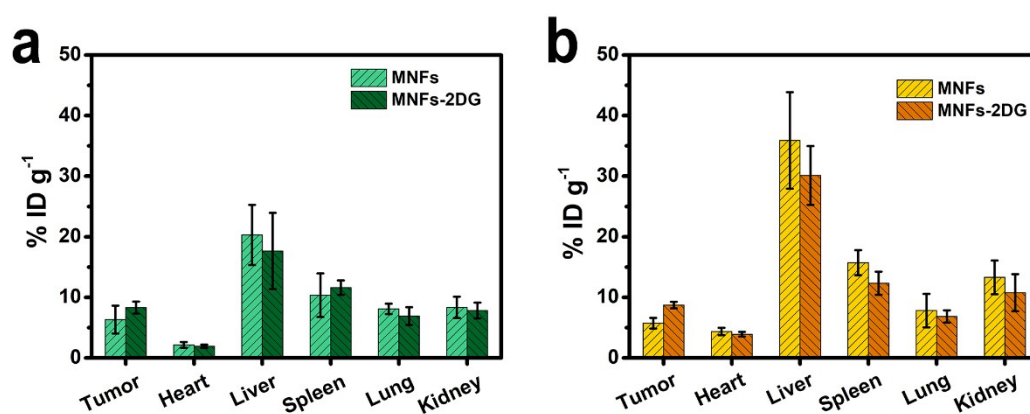

**Figure S4.** (a) Biodistribution in mice of MNFs and MNFs-2DG at 1 h and (b) at 24 h after intravenous injection.

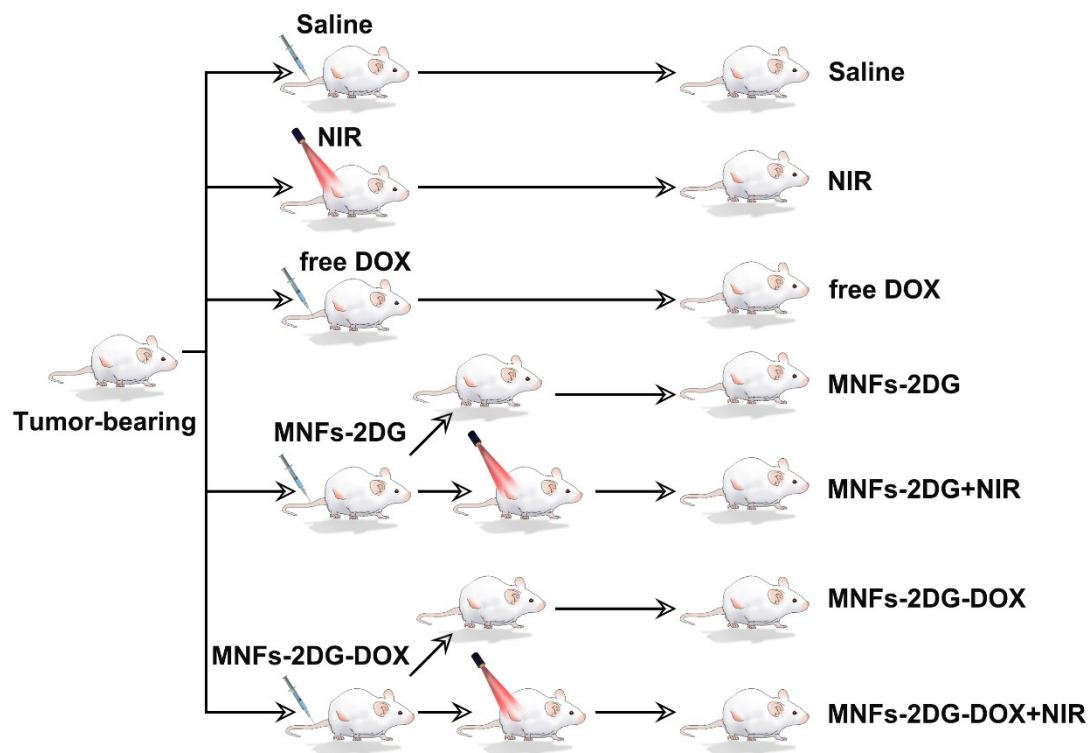

**Figure S5.** Experimental design of the antitumor study in mice bearing subcutaneous 4T1 tumors (n = 5).

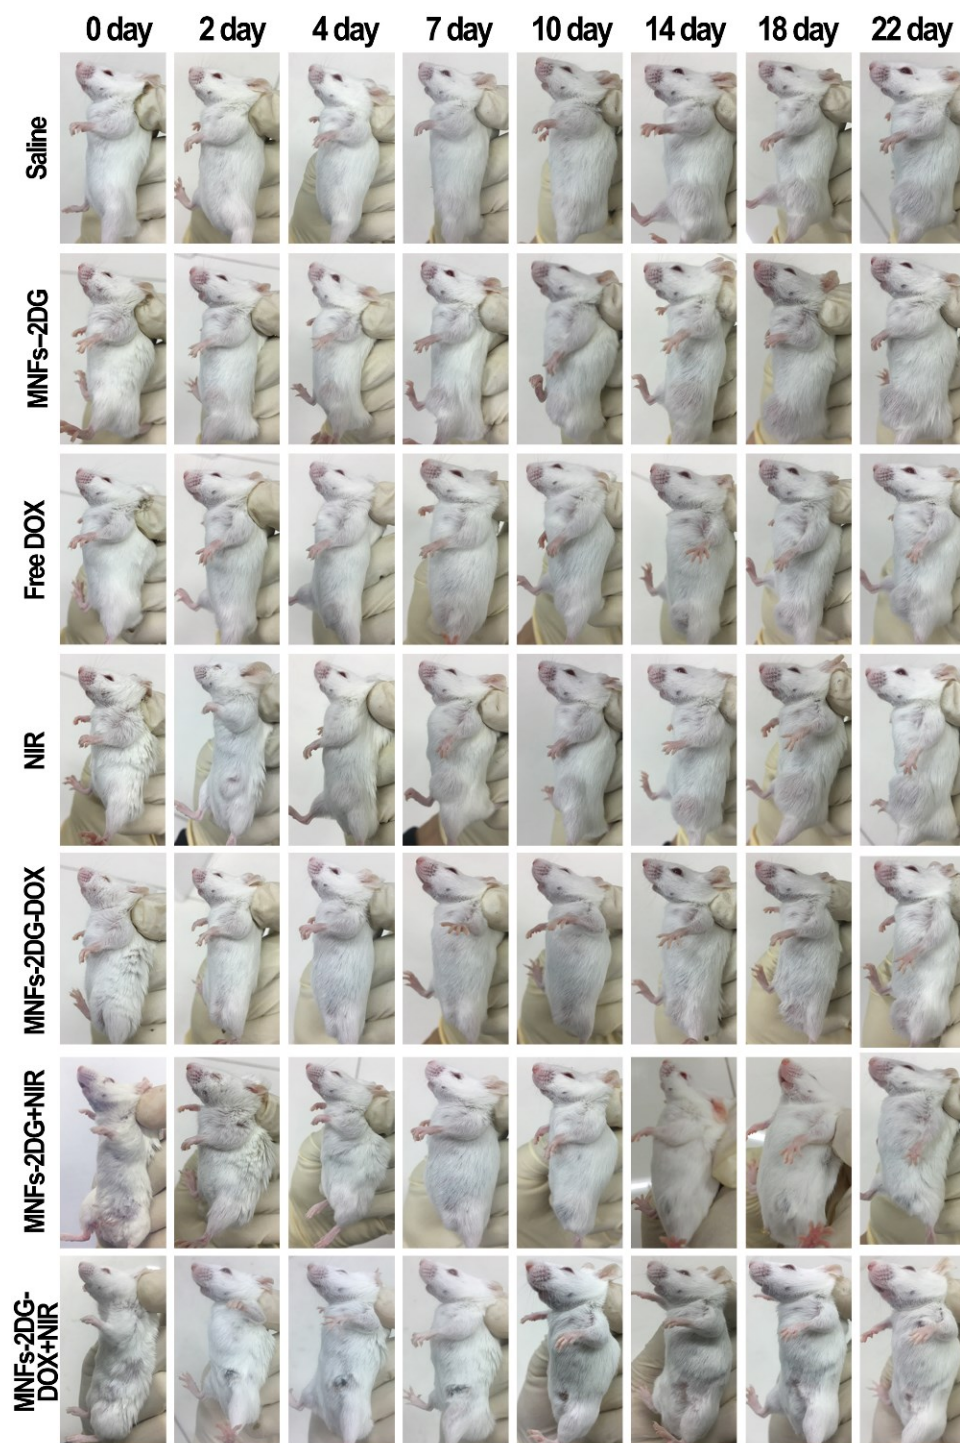

**Figure S6.** The photographs of representative mice for each group acquired at 0, 2, 4, 7, 10, 14, 18, and 22 days.



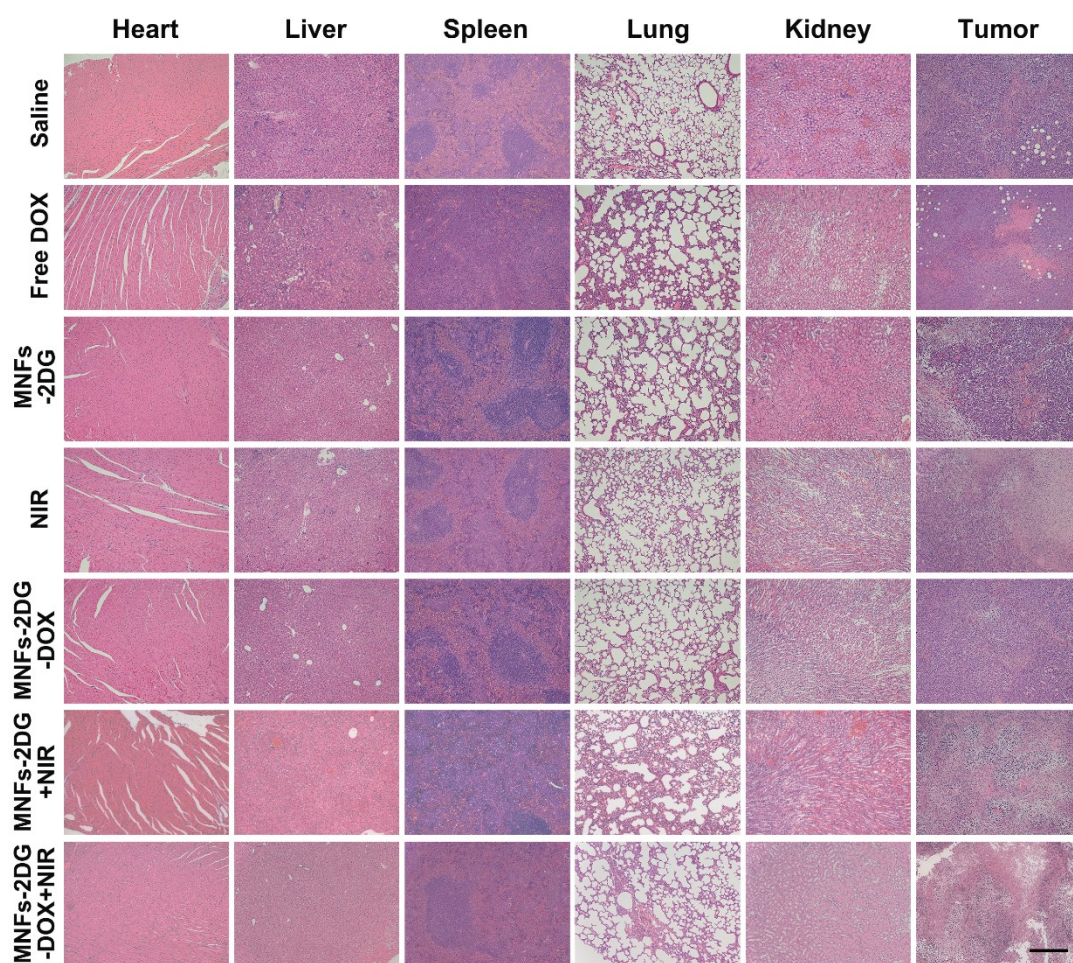

**Figure S7.** The H&E staining of tumor, heart, liver, spleen, lung, and kidney of mice from the different groups. Scale bar = 200  $\mu$ m.
